# Supplementary material for: A chromatin code for alternative splicing involving a putative association between CTCF and HP1α proteins
Source: PubMed Central journal article supplement (PMC4446157; doi:10.1186/s12915-015-0141-5), 2015-05-02
Supplement: 12915_2015_141_MOESM1_ESM.pdf [file 12915_2015_141_MOESM1_ESM.pdf]

## Supplementary Material

### A chromatin code for alternative splicing involving a putative association between CTCF and HP1 $\alpha$ proteins

**Eneritz Agirre<sup>1,5,\*</sup>, Nicolás Bellora<sup>1,6,\*</sup>, Mariano Alló<sup>2,7,\*</sup>, Amadís Pagès<sup>1,3</sup>, Paola Bertucci<sup>2</sup>, Alberto R. Kornblihtt<sup>2</sup>, Eduardo Eyras<sup>1,4§</sup>**

<sup>1</sup> Universitat Pompeu Fabra. E-08003 Barcelona, Spain

<sup>2</sup>IFIBYNE-UBA-CONICET, Departamento de Fisiología, Biología Molecular y Celular, Facultad de Ciencias Exactas y Naturales, Universidad de Buenos Aires. (C1428EHA) Buenos Aires, Argentina.

<sup>3</sup>Centre for Genomic Regulation, E-08003, Barcelona, Spain

<sup>4</sup>Catalan Institution of Research and Advanced Studies (ICREA), E-08010 Barcelona, Spain.

<sup>5</sup> Present address: Institute of Human Genetics, CNRS UPR 1142, Montpellier, France.

<sup>6</sup> Present address: INIBIOMA, CONICET-UNComahue, Bariloche, Río Negro, Argentina.

<sup>7</sup> Present address: European Molecular Biology Laboratory, Meyerhofstrasse 1, 69117 Heidelberg, Germany.

\*These authors contributed equally to this work

§Corresponding author

# Supplementary figure 1

(A)

Skipping

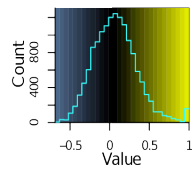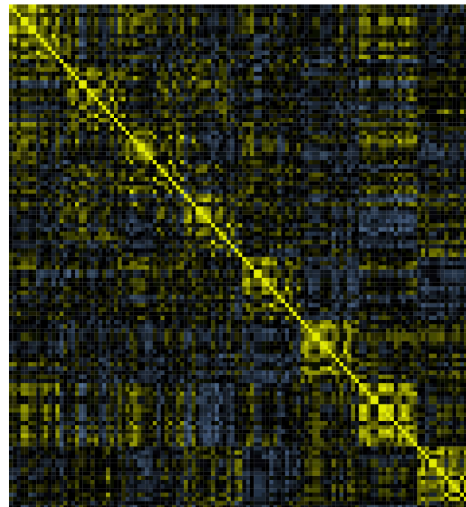

AGO1  
H3K27me3  
H3K36me3  
H3K9me2  
5metC  
HP1  
RNAPII  
CTCF

(B)

Inclusion

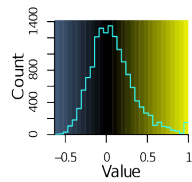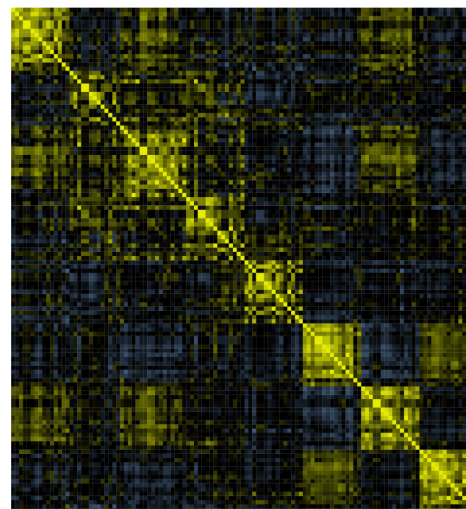

AGO1  
H3K27me3  
H3K36me3  
H3K9me2  
5metC  
HP1  
RNAPII  
CTCF

(C)

Non-regulated

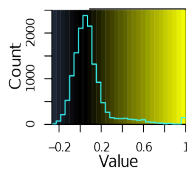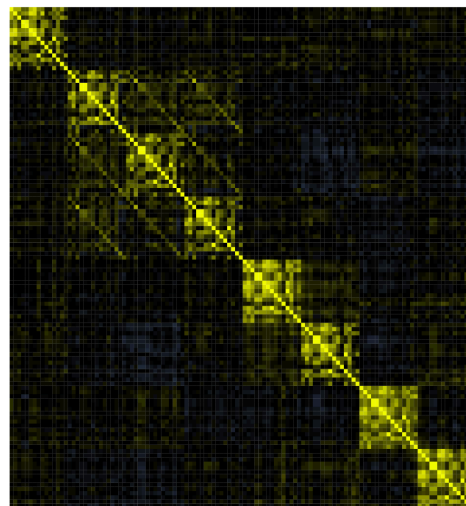

AGO1  
H3K27me3  
H3K36me3  
H3K9me2  
5metC  
HP1  
RNAPII  
CTCF

CTCF  
RNAPII  
HP1  
5metC  
H3K9me2  
H3K36me3  
H3K27me3  
AGO1

**Supplementary Figure 1 - Pairwise correlation of attributes.** Pairwise correlations between all attributes for skipping **(A)**, inclusion **(B)** and non-regulated **(C)** events. Each attribute is defined by an experiment – region pair. These regions are defined on exon triplets (see Figure 1A): windows flanking exons ( $w_{i1}$ ,  $w_{i2}$ , ... ,  $w_{i6}$ ) are 300nt in length, junctions regions ( $J_1$ , ... ,  $J_4$ ) are 200nt in length, covering 100nt on either side of the exon boundaries. The rest of the regions were taken to be the total length of the exon ( $E_1$ ,  $E_2$ ,  $E_3$ ) or of the intron ( $I_1$ ,  $I_2$ ). The attributes are grouped by experiment and given in the same order in the three heatmaps. Attributes corresponding to overlapping regions show strong correlations.

# Supplementary figure 2

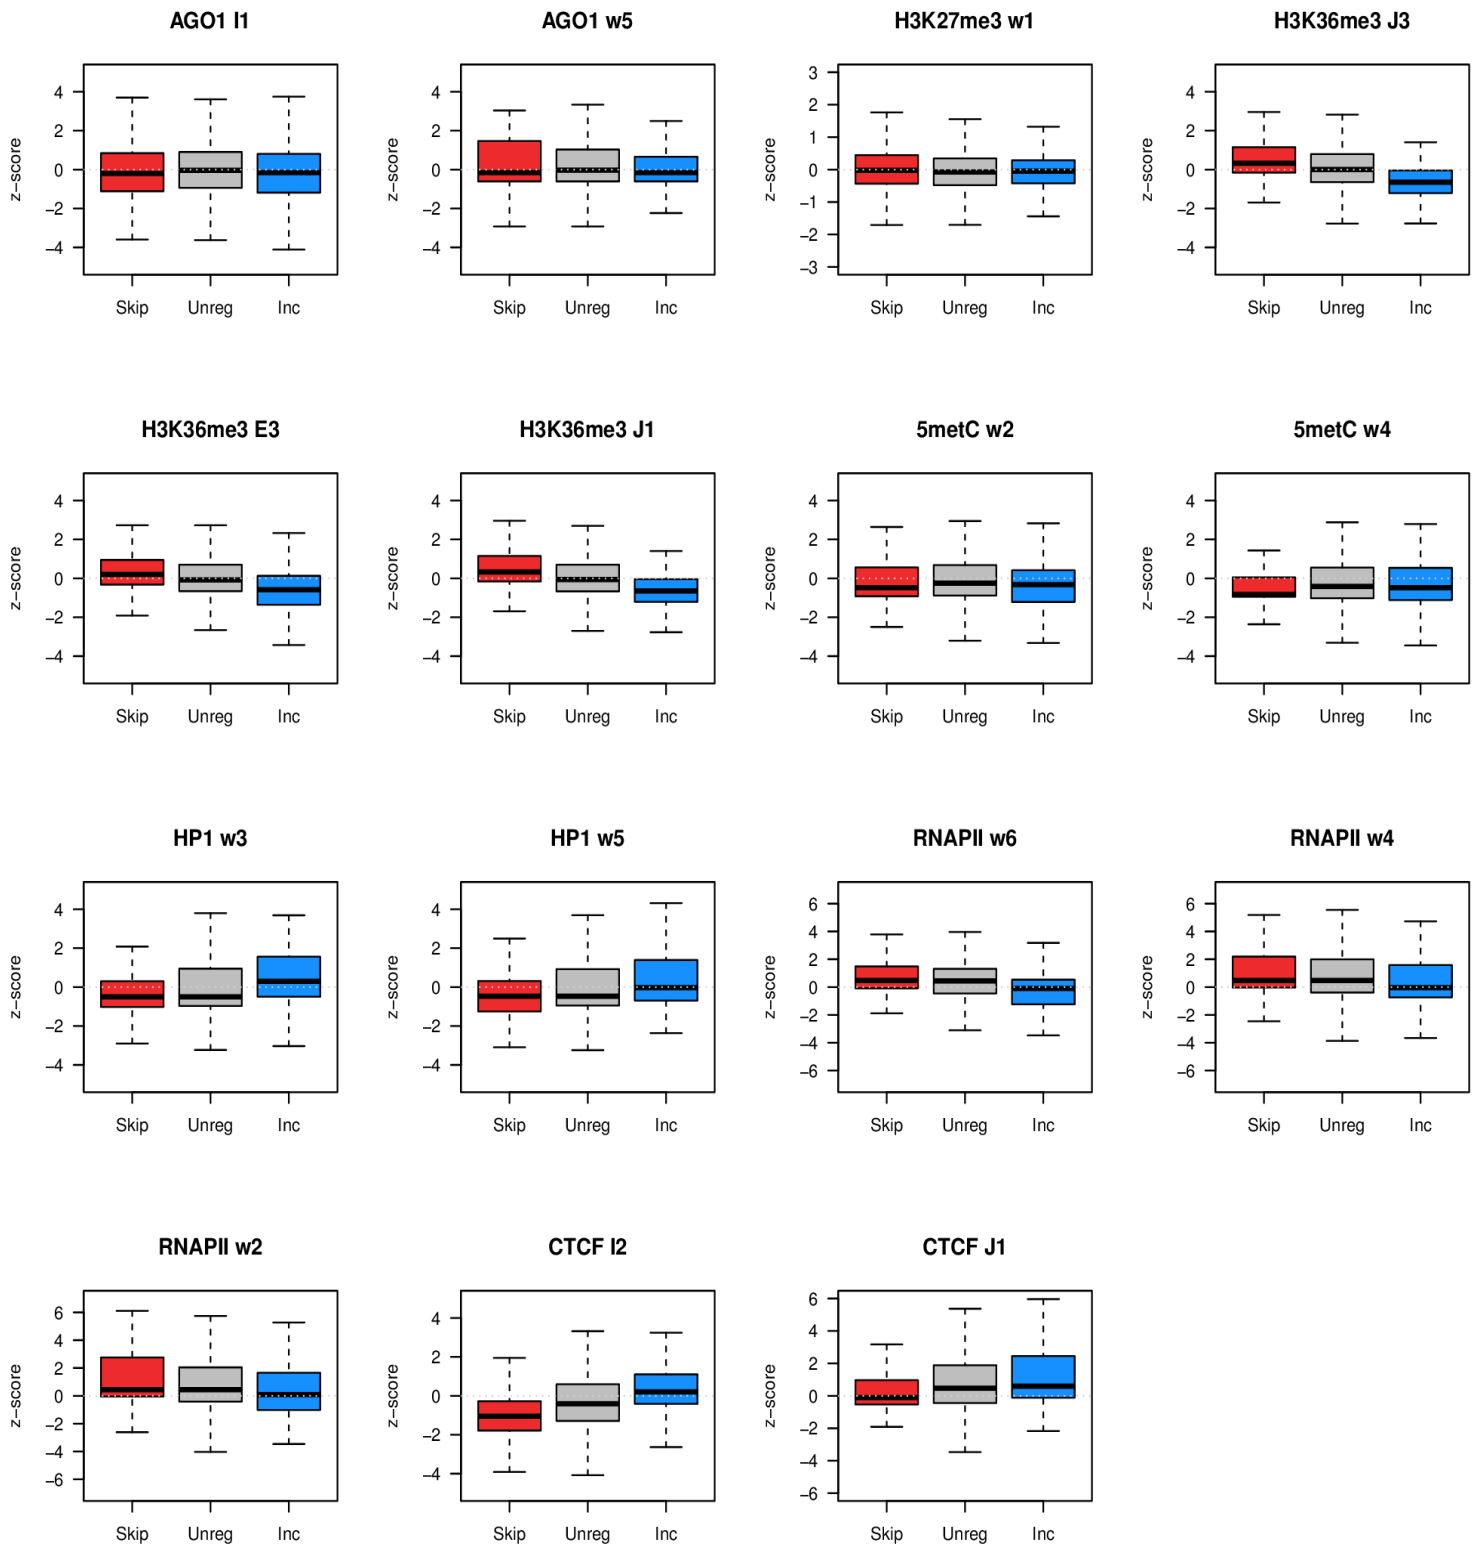

**Supplementary Figure 2. Attribute distributions.** Distributions of the enrichment z-scores of the correctly classified events for the 15 selected attributes compared to the set of non-regulated events. Skipping exons (red), inclusion exons (blue) and non-regulated exons (grey).

# Supplementary figure 3

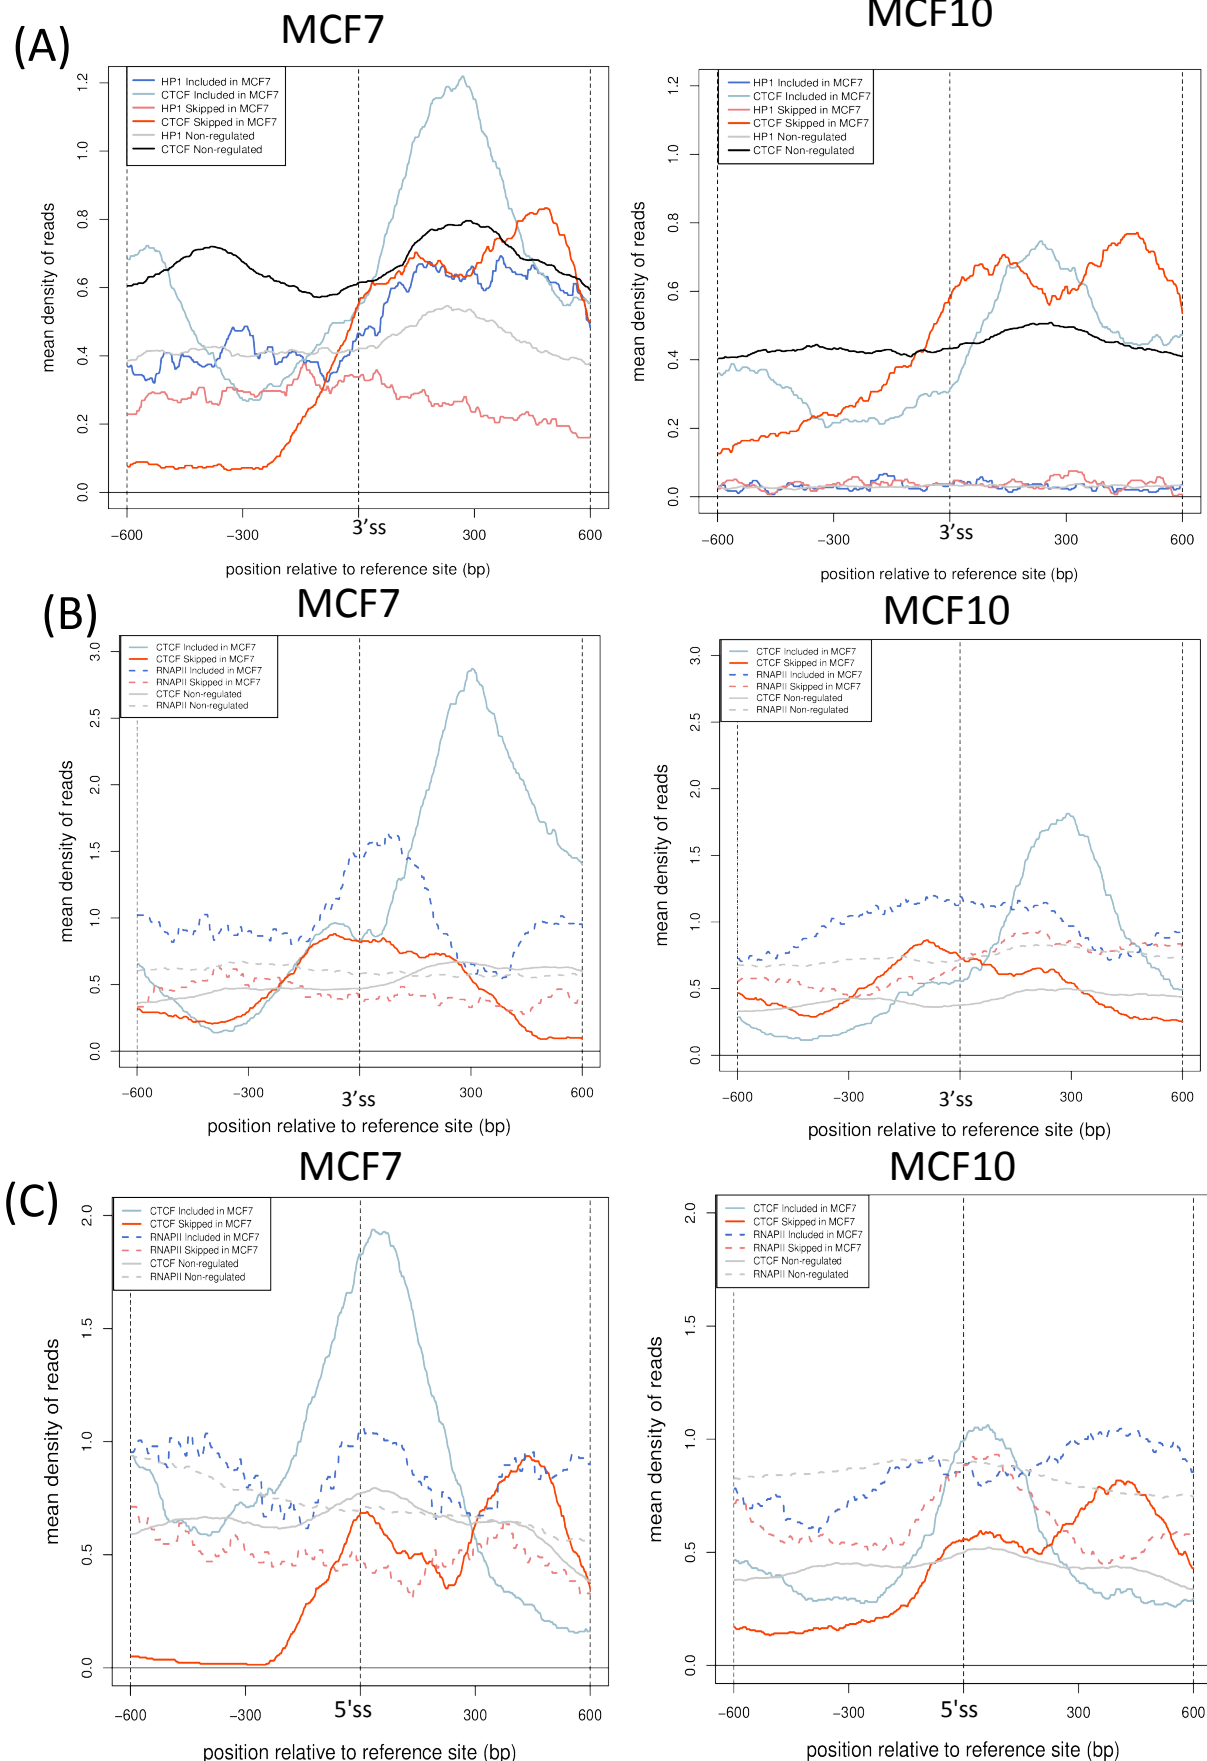

**Supplementary Figure 3. Read densities for some the selected features.** The profiles show the mean read densities (y-axis) from -600bp to 600bp (x-axis) centered at the 3'ss of the regulated (E2) or the 5'ss of the flanking exon E3 for both cell lines and separately for skipped exons (red), included exons (blue) and non-regulated exons (gray/black). (A) Profiles of HP1 $\alpha$  and CTCF in MCF7 and MCF10 around 3' splice-sites of regulated exons. (B) Profiles for the CTCF and RNAPII read densities in MCF7 and MCF10 cells around the 3' splice-sites of the exon 3 (E3). (C) Profiles for the CTCF and RNAPII read densities in MCF7 and MCF10 cells around the 5' splice-sites of the flanking exon E3.

# Supplementary figure 4

(A)

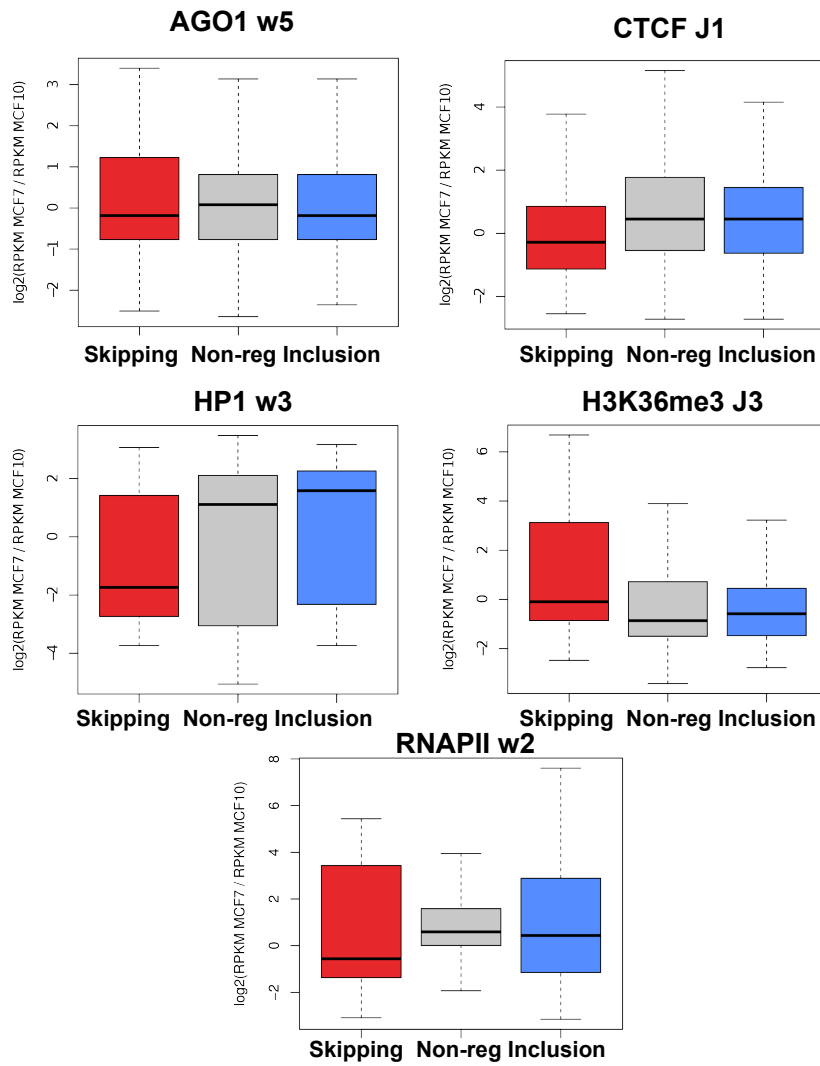

**Supplementary Figure 4. Read densities for the selected features.** Density differences between MCF7 and MCF10A, measured as the  $\log_2$ -ratio of RPKM values (y-axis) for different features characterized by an experiment-region pair, separately for skipped exons (red), inclusion exons (blue) and non-regulated exons (gray).

## Supplementary Figure 5

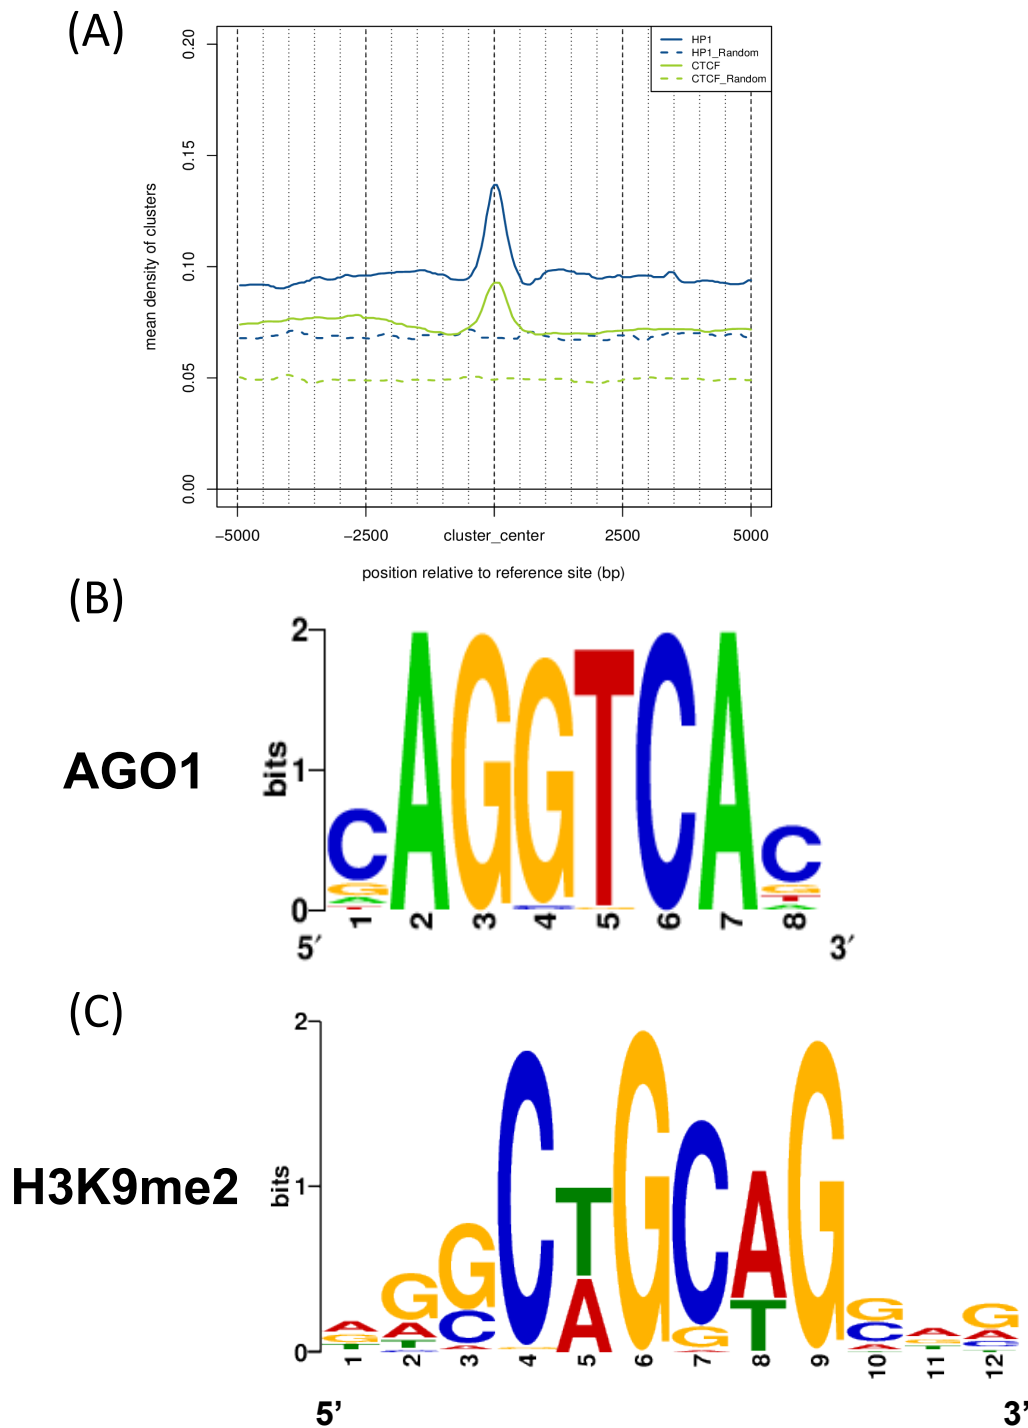

**Supplementary Figure 5.** (A) Mean densities of HP1 clusters centered at CTCF clusters (blue line), compared with randomized HP1 clusters (dashed blue line) in intragenic regions, 2kb away from the TSS; and mean densities of CTCF clusters (green line) centered at the HP1 clusters, compared with randomized CTCF clusters (dashed green line). Randomized clusters were calculated by relocating each cluster in an arbitrary new position in the same genic regions, avoiding the overlap with any other random clusters. (B). Consensus motif found for AGO1. The motif was built using the top 10 heptamers from significant AGO1 clusters and running MEME on the clusters with these motifs (see Materials and Methods). (C). Consensus motif found for H3K9me2 regions. The motif was built as the AGO1 motif, using the top 10 heptamers from significant H3K9me2 clusters and running MEME on the clusters with these motifs (see Materials and Methods).

# Supplementary Figure 6

(A)

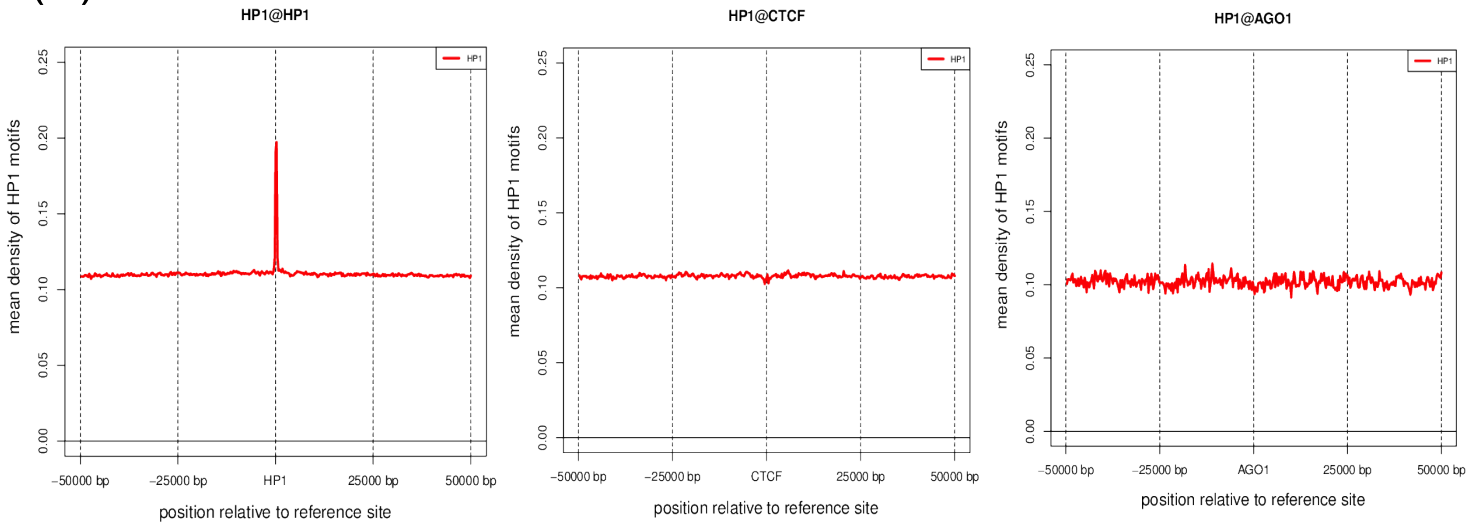

(B)

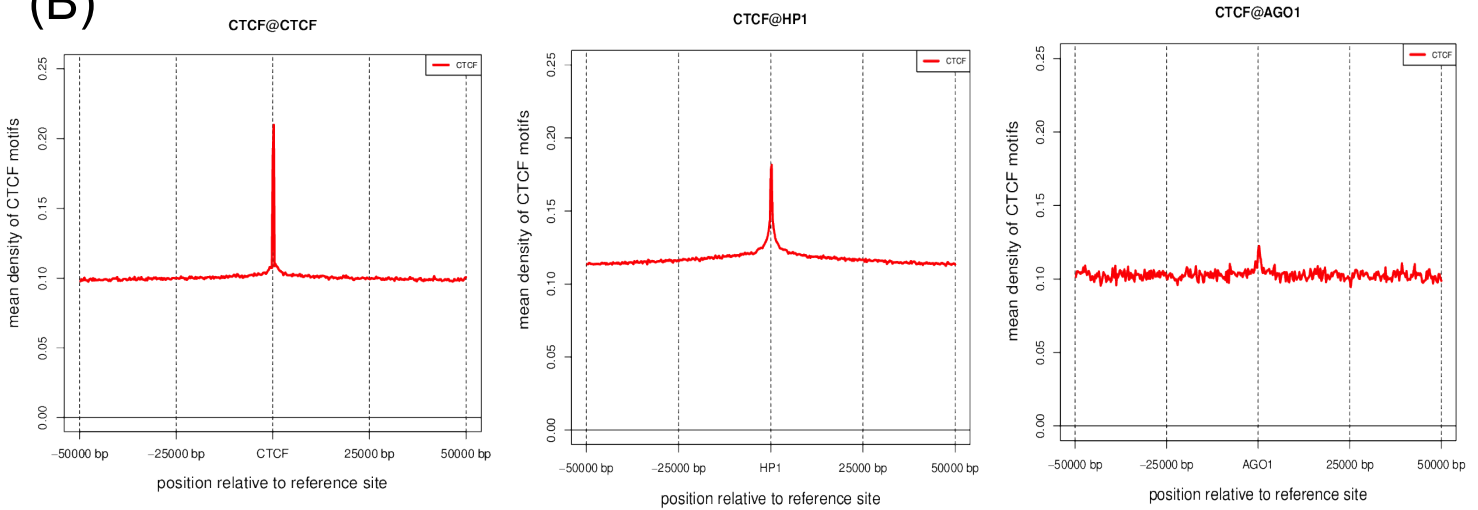

(C)

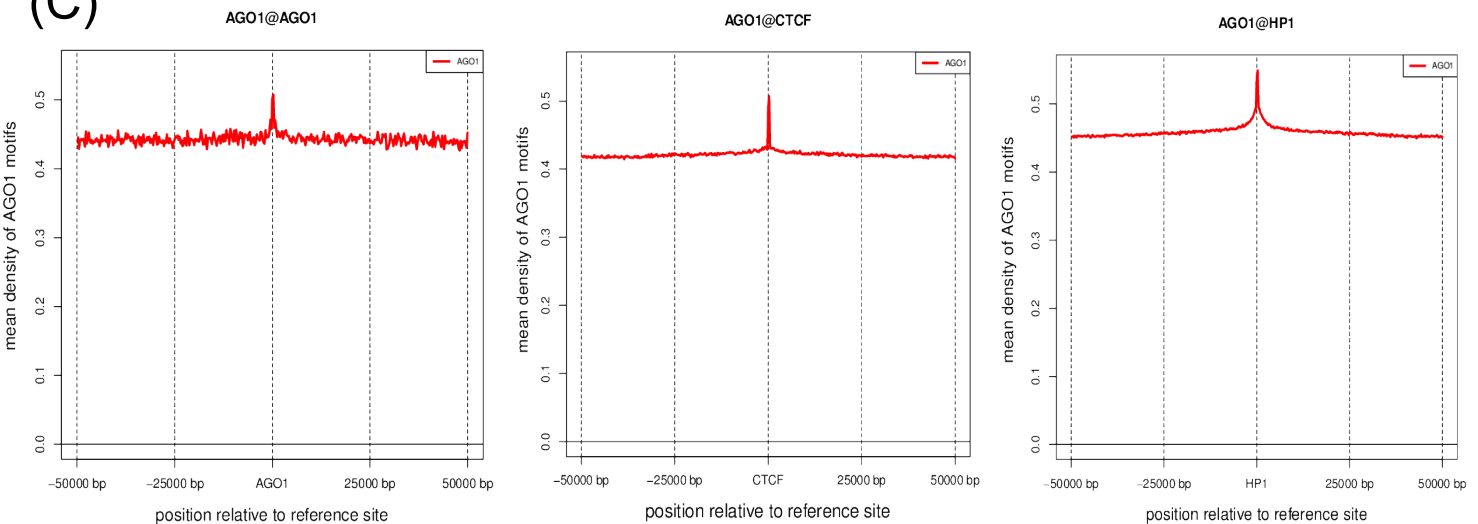

**Supplementary Figure 6. Density profiles of the consensus motifs over significant clusters.** Motifs were built using the top 10 heptamers from significant clusters for HP1 $\alpha$ , CTCF and AGO1 (see Materials and Methods). Profiles for each sample show the mean density of motifs over the clusters. **(A)** HP1 $\alpha$ , motifs **(B)** CTCF motifs and **(C)** AGO1 motifs. HP1 $\alpha$  has the most specific motif, whereas AGO1 gives signal over the others clusters due to high level of overlap with CTCF and HP1 $\alpha$ .



## Supplementary Figure 7

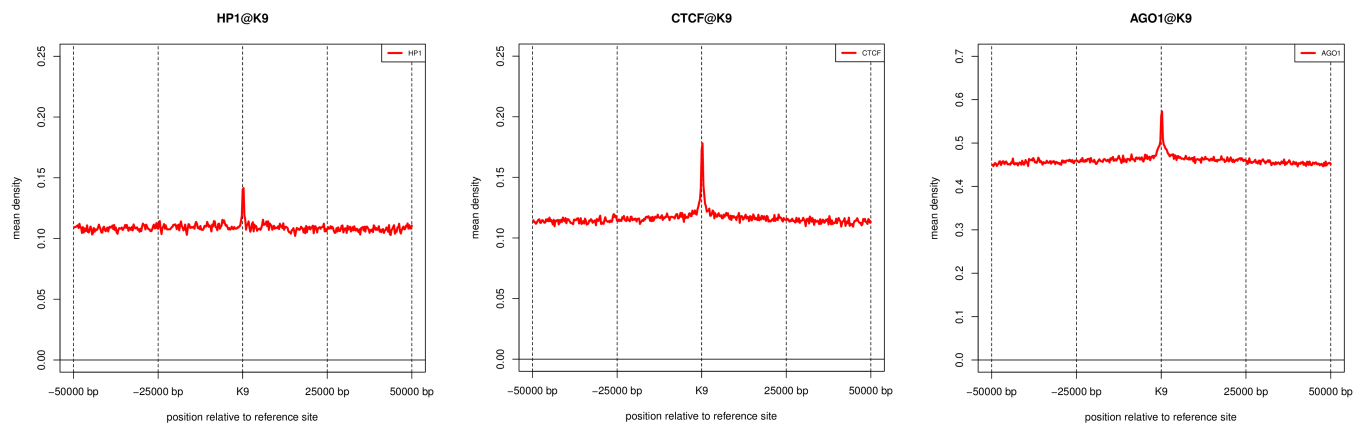

**Supplementary Figure 7. Density profiles of the consensus motifs over H3K9me2 significant clusters.** Motifs were built using the top 10 heptamers from significant clusters for HP1 $\alpha$ , CTCF and AGO1 (see Materials and Methods). Profiles for each sample show the mean density of motifs over the H3K9me2

## Supplementary Tables

**Supplementary Table 1.** Correlating features with  $R > 0.6$  in non-regulated, events.

| Non-regulated events |             |           |
|----------------------|-------------|-----------|
| Attribute            | Attribute   | Pearson R |
| H3K9me2-I1           | H3K27me3-I1 | 0.76      |
| H3K27me3-I2          | H3K36me3-I2 | 0.67      |
| H3K27me3-I2          | H3K9me2-I2  | 0.66      |
| H3K36me3-I1          | H3K27me3-I1 | 0.64      |
| H3K36me3-I1          | H3K9me2-I1  | 0.64      |
| H3K36me3-I2          | H3K9me2-I2  | 0.54      |
| H3K27me3-w2          | H3K9me2-w2  | 0.53      |
| H3K27me3-J1          | H3K9me2-J1  | 0.5       |

**Supplementary Table 2.** Correlating features with  $R > 0.6$  in inclusion events.

| Inclusion events |             |           |
|------------------|-------------|-----------|
| Attribute        | Attribute   | Pearson R |
| H3K27me3-I1      | H3K9me2-I1  | 0.85      |
| H3K27me3-I1      | H3K36me3-I1 | 0.85      |
| H3K36me3-I1      | H3K9me2-I1  | 0.85      |
| H3K36me3-J1      | H3K9me2-J1  | 0.71      |
| H3K36me3-J3      | H3K9me2-J1  | 0.71      |
| H3K36me3-w1      | H3K9me2-J1  | 0.71      |
| H3K27me3-w5      | H3K9me2-w5  | 0.67      |
| H3K36me3-E1      | H3K9me2-J1  | 0.66      |
| H3K36me3-J4      | AGO1-J4     | 0.62      |
| H3K36me3-J4      | AGO1-J2     | 0.62      |
| H3K27me3-J1      | H3K9me2-I1  | 0.62      |
| 5metC-J1         | CTCF-w5     | 0.61      |
| H3K27me3-w1      | H3K36me3-J1 | 0.61      |
| H3K27me3-w1      | H3K36me3-J3 | 0.61      |

**Supplementary Table 3.** Correlating features with R > 0.6 in skipping.

| Skipping events |             |           |
|-----------------|-------------|-----------|
| Attribute       | Attribute   | Pearson R |
| H3K27me3-I1     | H3K9me2-I1  | 0.81      |
| RNAPII-w5       | H3K36me3-I1 | 0.77      |
| H3K27me3-I1     | H3K36me3-I1 | 0.75      |
| RNAPII-J2       | AGO1-I2     | 0.74      |
| RNAPII-I2       | AGO1-w6     | 0.73      |
| RNAPII-I2       | AGO1-E3     | 0.73      |
| H3K36me3-I1     | H3K9me2-I1  | 0.72      |
| RNAPII-E2       | AGO1-I2     | 0.7       |
| RNAPII-w3       | AGO1-I2     | 0.69      |
| RNAPII-I2       | AGO1-J4     | 0.68      |
| H3K27me3-w5     | CTCF-w1     | 0.67      |
| RNAPII-J3       | AGO1-I2     | 0.67      |
| H3K36me3-E1     | RNAPII-J4   | 0.66      |
| RNAPII-I1       | H3K36me3-I1 | 0.66      |
| H3K36me3-w1     | RNAPII-J4   | 0.65      |
| H3K27me3-I1     | RNAPII-w2   | 0.65      |
| RNAPII-J2       | AGO1-J4     | 0.64      |
| RNAPII-J2       | AGO1-w6     | 0.64      |
| H3K36me3-I1     | RNAPII-I2   | 0.64      |
| RNAPII-I2       | AGO1-I2     | 0.64      |
| RNAPII-I2       | AGO1-E3     | 0.64      |
| RNAPII-J2       | AGO1-I2     | 0.64      |
| AGO1-E3         | H3K27me3-I1 | 0.63      |
| AGO1-J2         | H3K27me3-w2 | 0.63      |
| AGO1-w6         | H3K27me3-w2 | 0.63      |
| H3K9me2-w2      | CTCF-J3     | 0.63      |
| H3K27me2-E2     | H3K36me-w5  | 0.63      |
| H3K36me3-J1     | RNAPII-I1   | 0.63      |
| H3K27me3-I1     | AGO1-w6     | 0.63      |
| H3K27me3-w2     | AGO1-E3     | 0.62      |
| RNAPII-E2       | AGO1-w6     | 0.61      |
| RNAPII-w2       | H3K27me3-w1 | 0.6       |

**Supplementary Table 4.** Anticorrelating features with  $R \leq -0.5$  in inclusion events. Non-regulated events did not show any anticorrelating pair of features.

| Inclusion events |             |                           |
|------------------|-------------|---------------------------|
| Attribute        | Attribute   | Anticorrelation Pearson R |
| AGO1-J1          | 5metC-I1    | -0.63                     |
| HP1-w1           | H3K27me3-J1 | -0.58                     |
| RNAPII-w5        | 5metC-I1    | -0.58                     |
| HP1-E1           | H3K27me3-J1 | -0.57                     |
| CTCF-w2          | H3K27me3-J1 | -0.55                     |
| CTCF-w2          | H3K27me3-E1 | -0.55                     |
| RNAPII-w3        | HP1-w3      | -0.55                     |
| AGO1-w2          | H3K9me2-w5  | -0.52                     |
| CTCF-w2          | H3K27me3-E1 | -0.52                     |
| AGO1-J1          | 5metC-J1    | -0.5                      |

**Supplementary Table 5.** Anticorrelating features with  $R \leq -0.5$  in skipping events. Non-regulated events did not show any anticorrelating pair of features.

| Skipping events |             |                   |
|-----------------|-------------|-------------------|
| Attributes      | Attributes  | Anticorrelation R |
| RNAPII-w4       | H3K9me2-w4  | -0.68             |
| RNAPII-w5       | H3K9me2-J3  | -0.67             |
| H3K27me3-w6     | RNAPII-w3   | -0.64             |
| RNAPII-I2       | H3K9me2-J3  | -0.63             |
| H3K9me2-J3      | RNAPII-I2   | -0.63             |
| H3K27me3-w6     | RNAPII-I2   | -0.63             |
| HP1-w4          | H3K9me2-J4  | -0.62             |
| RNAPII-I1       | 5metC-J4    | -0.61             |
| RNAPII-J3       | H3K9me2-w4  | -0.61             |
| H3K27me3-J4     | RNAPII-w3   | -0.6              |
| AGO1-w2         | RNAPII-J1   | -0.6              |
| RNAPII-w5       | H3K9me2-w4  | -0.6              |
| H3K9me2-w4      | RNAPII-I2   | -0.6              |
| RNAPII-I2       | H3K9me2-w4  | -0.59             |
| H3K27me3-w6     | AGO1-J4     | -0.59             |
| CTCF-J1         | RNAPII-w5   | -0.59             |
| RNAPII-w3       | H3K9me2-w4  | -0.58             |
| H3K9me2-w4      | RNAPII-w3   | -0.58             |
| RNAPII-E2       | H3K9me2-w4  | -0.58             |
| H3K9me2-w4      | RNAPII-w3   | -0.58             |
| H3K27me3-w3     | 5metC-w6    | -0.57             |
| AGO1-w2         | HP1-E2      | -0.56             |
| AGO1-J1         | H3K36me3-E1 | -0.55             |
| H3K27me3-I1     | 5metC-E3    | -0.55             |
| AGO1-J1         | H3K36me3-w1 | -0.55             |
| H3K27me3-w6     | AGO1-I2     | -0.54             |

|             |             |       |
|-------------|-------------|-------|
| RNAPII-J2   | H3K9me2-w2  | -0.53 |
| CTCF-J3     | 5metC-E1    | -0.52 |
| H3K9me2-I1  | CTCF-J1     | -0.51 |
| CTCF-w2     | H3K9me2-w2  | -0.51 |
| H3K36me3-E1 | H3K9me2-w3  | -0.5  |
| AGO1-w2     | RNAPII-w5   | -0.5  |
| HP1-I2      | 5metC-w1    | -0.5  |
| AGO1-I2     | H3K36me3-w4 | -0.5  |
| HP1-I2      | 5metC-E1    | -0.5  |
| H3K9me2-w2  | 5metC-E1    | -0.5  |

**Supplementary Table 6.** Scores from the three different feature selection methods for the selected attributes (indicated with an asterisk)

| Attribute   | WSE(%) | CFS(%) | IG (Rank) | Selected attribute |
|-------------|--------|--------|-----------|--------------------|
| AGO1-I1     | 60     | 50     | 50        | *                  |
| AGO1-w5     | 60     | 50     | 60        | *                  |
| H3K36me3-J1 | 100    | 80     | 1         | *                  |
| H3K36me3-J3 | 80     | 100    | 2         | *                  |
| H3K36me3-I1 | 60     | 100    | 3         |                    |
| H3K36me3-E3 | 90     | 90     | 6         | *                  |
| H3K36me3-J4 | 60     | 60     | 8         |                    |
| H3K27me3-w1 | 60     | 50     | 56        | *                  |
| RNAPII-w6   | 90     | 80     | 5         | *                  |
| RNAPII-w2   | 100    | 70     | 9         | *                  |
| RNAPII-w4   | 50     | 80     | 10        | *                  |
| HP1-w5      | 50     | 50     | 41        | *                  |
| HP1-w3      | 50     | 50     | 54        | *                  |
| 5metC-w2    | 50     | 50     | 20        | *                  |
| 5metC-w4    | 50     | 50     | 59        | *                  |
| CTCF-I2     | 60     | 90     | 4         | *                  |
| CTCF-J1     | 60     | 90     | 37        | *                  |

**Supplementary Table 7.** Predictive performance of the model when removing all features corresponding to CTCF-I2, HP1 or AGO1 signals; or using just using a combination of them.

| Correctly predicted | Only CTCF+HP1 +AGO1 | Only HP1+ CTCF | Without CTCF | Without AGO1 | Without HP1 | Model       |
|---------------------|---------------------|----------------|--------------|--------------|-------------|-------------|
| Total               | 516 (58.37%)        | 520(58.8%)     | 550(58.8%)   | 551(62.3%)   | 558(63.12%) | 606(68.55%) |
| Inclusion           | 224                 | 248            | 261          | 279          | 299         | 282         |
| Skipping            | 292                 | 272            | 289          | 272          | 259         | 324         |
| ROC area            | 0.6                 | 0.62           | 0.65         | 0.68         | 0.68        | 0.73        |
| TPR                 | 0.58                | 0.58           | 0.62         | 0.62         | 0.63        | 0.67        |
| FPR                 | 0.41                | 0.41           | 0.37         | 0.38         | 0.37        | 0.31        |
| Precision           | 0.58                | 0.58           | 0.62         | 0.62         | 0.63        | 0.68        |
| Recall              | 0.58                | 0.58           | 0.62         | 0.62         | 0.63        | 0.68        |

**Supplementary Table 8.** Proportion of clusters from each sample overlapping with clusters from the other samples together with the significance z-scores.

| SampleA over SampleB | % of A overlapping B | zscore | Significant zscore |
|----------------------|----------------------|--------|--------------------|
| AGO1 over 5metC      | 52.6                 | 222.83 | *                  |
| AGO1 over CTCF       | 13.1                 | 17.68  | *                  |
| AGO1 over HP1        | 41.8                 | 75.63  | *                  |
| AGO1 over RNAPII     | 28.8                 | 34.89  | *                  |
| 5metC over AGO1      | 3.4                  | -18.3  |                    |
| 5metC over CTCF      | 14.5                 | -15.96 |                    |
| 5metC over HP1       | 30.7                 | 3      | *                  |
| 5metC over RNAPII    | 14.5                 | -20.81 |                    |
| CTCF over AGO1       | 0.8                  | -13.33 |                    |
| CTCF over 5metC      | 20.4                 | 168.21 | *                  |
| CTCF over HP1        | 18                   | 112.3  | *                  |
| CTCF over RNAPII     | 11                   | 43.17  | *                  |
| HP1 over AGO1        | 1.9                  | -14.56 |                    |
| HP1 over 5metC       | 29.4                 | 121.32 | *                  |
| HP1 over CTCF        | 11.4                 | 17.04  | *                  |
| HP1 over RNAPII      | 10.4                 | -3.97  |                    |
| RNAPII over AGO1     | 2.1                  | -2.62  |                    |
| RNAPII over 5metC    | 21.2                 | 174.28 | *                  |
| RNAPII over CTCF     | 11.2                 | 113.2  | *                  |
| RNAPII over HP1      | 16.4                 | 110.12 | *                  |
